# Supplementary material
Source: PubMed Central journal article supplement (PMC6390958)
Supplement: NIHMS999413-supplement-Supp_Fig_Legend_1.pdf [file NIHMS999413-supplement-Supp_Fig_Legend_1.pdf]

## Legend

### Supplementary Figure 1

**Adoptive therapy of anti-VEGFR2 CAR transduced T cell treatment modulated intratumoral MDSCs in tumor bearing mice.** C57BL/6 mice bearing 12 days-old B16 tumor were sublethally irradiated with 5 Gy TBI and treated with genetically engineered syngeneic T cells essentially as described in Fig. 5. Tumors and spleens of 3 mice from each group were excised at different time points post therapy and processed to obtain single cell suspensions and analyzed by flow cytometry. Percentage of the CD11b<sup>+</sup>Gr1<sup>+</sup> myeloid subsets was determined in total viable fraction of the cell preparations by FACS. Absolute cell numbers CD11b<sup>+</sup>Gr1<sup>+</sup> cells were determined by multiplying the percentage of CD11b<sup>+</sup>Gr1<sup>+</sup> cells by the total number of viable cells. (A) A representative FACS data from single cell preparations of spleen and tumor tissues from one mouse in each group obtained on day 6 day post-ACT showing the percentage CD11b<sup>+</sup>Gr1<sup>+</sup> cells gated in the in total viable populations. (B) Pooled data obtained from three mice from each group collected at three different time points post T cell therapy showing the percentage and total number of CD11b<sup>+</sup>Gr1<sup>+</sup> cells in spleen and tumor tissues. Data represented as mean  $\pm$  SEM.
