# Supplementary material
Source: PubMed Central journal article supplement (PMC6390958)

# Supplementary Fig. 1

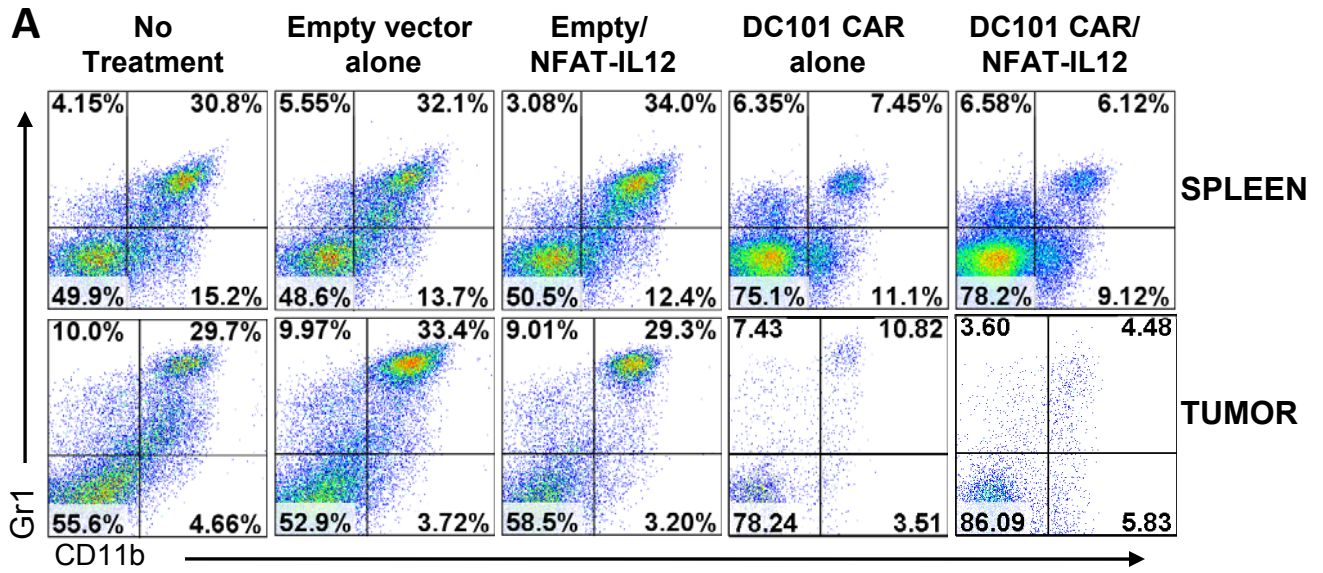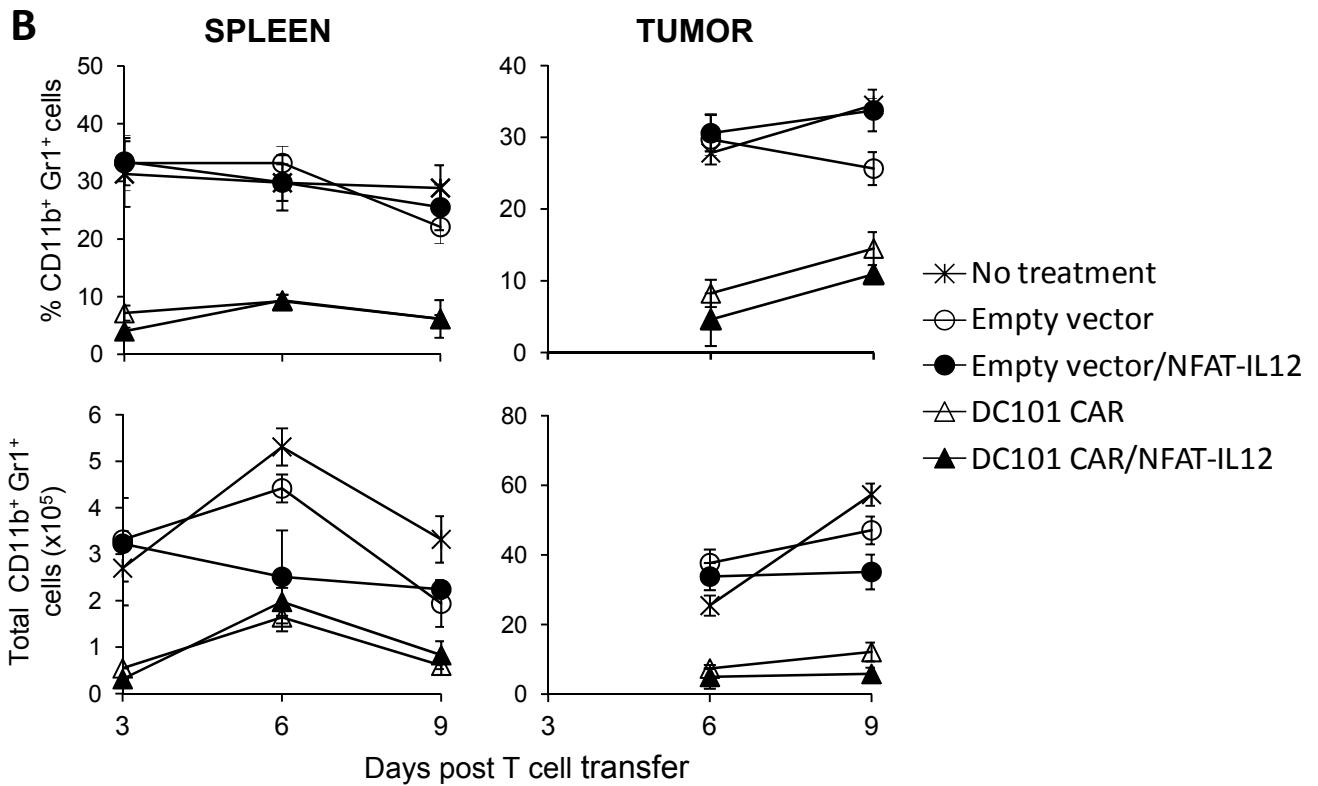

Supplement: NIHMS999413-supplement-Supp_Fig_1.pdf [file NIHMS999413-supplement-Supp_Fig_1.pdf]
